# Supplementary material
Source: PubMed Central journal article supplement (PMC5514410)

**Supplementary Figure 1** Flow chart for the patient selection process.

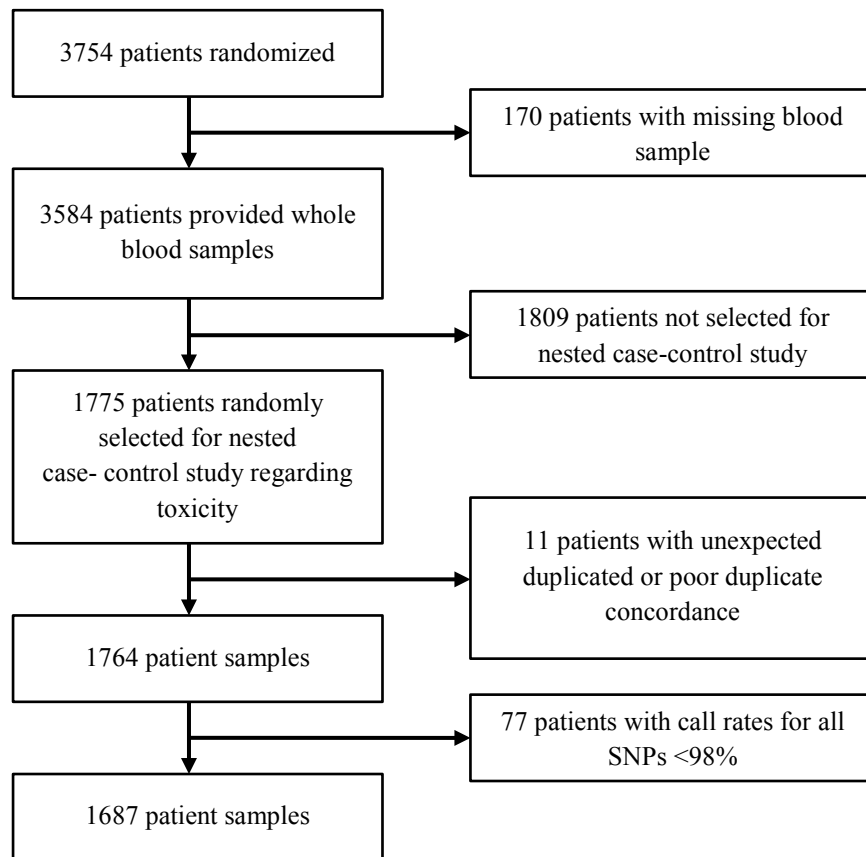

Supplement: 10-1055-s-0042-113189-sup_gf1089.pdf [file 10-1055-s-0042-113189-sup_gf1089.pdf]
